# Supplementary material for: Genome sequencing and comparative genomics reveal the potential pathogenic mechanism of Cercospora sojina Hara on soybean
Source: PubMed Central journal article supplement — DNA Res. 2017 Sep 18;25(1):25–37. doi: 10.1093/dnares/dsx035 (PMC5824798; doi:10.1093/dnares/dsx035), 2017-09-18
Supplement: dsx035_supplemental_table.pdf [file dsx035_supplemental_table.pdf]

**Table S1. Summary of original sequencing data of *C. sojina* from Illumina and Pacbio**

| Sequencing technology | Insert size (bp) | Reads length (bp) | Raw data    |                  | Trimmed data |                  |
|-----------------------|------------------|-------------------|-------------|------------------|--------------|------------------|
|                       |                  |                   | Read counts | Total bases (Gb) | Read counts  | Total bases (Gb) |
| Illumina              | 270              | 150               | 12,637,470  | 3.18             | 11,871,845   | 2.99             |
| Pacbio                | 10,000           | 8,279             | 450,876     | 5.14             | 593,849      | 4.92             |

**Table S2. Major features of assembled *C. sojina* genome**

| Type       | Count | Min length (bp) | Max length (bp) | Mean length (bp) |
|------------|-------|-----------------|-----------------|------------------|
| <b>N25</b> | 2     | 3,695,260       | 6,706,376       | 5,200,818        |
| <b>N50</b> | 6     | 1,594,415       | 6,706,376       | 3,440,875        |
| <b>N75</b> | 15    | 933,043         | 6,706,376       | 2,093,804        |
| <b>N90</b> | 23    | 451,093         | 6,706,376       | 1,600,775        |
| <b>All</b> | 62    | 17,575          | 6,706,376       | 658,651          |

**Table S3. Statistic analysis of specific motif for transmethylase**

| Motif     | Position | Type of modification | Fraction | nDetected | nGenome  | meanScore |
|-----------|----------|----------------------|----------|-----------|----------|-----------|
| ATATRGCAD | 1        | m6A                  | 0.17588  | 299       | 1700     | 38.24415  |
| GCRVNNNG  | 1        | Modified base        | 0.12090  | 79267     | 655644   | 36.67279  |
| RAGGYASYW | 2        | m6A                  | 0.11483  | 1379      | 12009    | 40.31110  |
| GNNNNNNH  | 1        | Modified base        | 0.10059  | 1595026   | 15857335 | 37.32386  |
| HGWGADTBG | 2        | Modified base        | 0.05528  | 1090      | 19718    | 36.11193  |
| DCSVNDBH  | 2        | m4C                  | 0.04430  | 27524     | 621346   | 39.74034  |
| CNNNNVNH  | 1        | m4C                  | 0.03446  | 420851    | 12212118 | 39.50249  |
| GGNNDTBGV | 1        | Modified base        | 0.02562  | 4831      | 188560   | 35.85096  |
| CNNNTB    | 1        | m4C                  | 0.01214  | 54010     | 4449757  | 39.88760  |
| RTVVADNNG | 2        | Modified base        | 0.01049  | 3196      | 304530   | 35.50532  |
| TNNNDNNH  | 1        | Modified base        | 0.00837  | 85541     | 10225018 | 36.40618  |
| TNNNCVVH  | 1        | Modified base        | 0.00439  | 9674      | 2205772  | 34.62022  |

Note: **m6A**, 6-methyl-adenosine; **m4C**, 4-methyl-cytosine; **Fraction**, the percentage of base modification in genome; **nDetected**, the number of modified motif; **nGenome**, the number of motif in *Cercospora sojina* genome; **meanScore**, mean score of the motif.

**Table S4. Characteristic of the annotated *C. soja* genes**

| <b>Database</b>      | <b>Number</b> | 100<=Protein length<300 | Protein length>=300 |
|----------------------|---------------|-------------------------|---------------------|
| GO_Annotation        | 4195          | 836                     | 3308                |
| KEGG_Annotation      | 3172          | 695                     | 2421                |
| KOG_Annotation       | 5417          | 1032                    | 4335                |
| Pfam_Annotation      | 7388          | 1545                    | 5767                |
| Swissprot_Annotation | 6240          | 1229                    | 4940                |
| TrEMBL_Annotation    | 9493          | 2235                    | 7117                |
| nr_Annotation        | 9487          | 2237                    | 7109                |
| <b>All Annotated</b> | 9506          | 2239                    | 7125                |

**Table S5. Expression of putative effector-coding genes in *C. sojae* during starvation treatment**

| <b>Response at both 24 and 48 hpt</b> | <b>Fold Change (24 h.p.t.)</b> | <b>Fold Change (48 h.p.t.)</b> | <b>Pfam Domain</b>                         |
|---------------------------------------|--------------------------------|--------------------------------|--------------------------------------------|
| CS_10225                              | 4.462860175                    | 6.451122157                    |                                            |
| CS_10796                              | 1.093041246                    | 1.058943252                    |                                            |
| CS_11263                              | 1.678911042                    | 1.24540773                     | PF01083.20;PF08237.9;PF02230.14;PF03583.12 |
| CS_11868                              | 1.317582711                    | 1.134881439                    |                                            |
| CS_12453                              | 1.550828123                    | 1.78915476                     | PF01822.17;PF03105.17                      |
| CS_12982                              | 2.422350654                    | 2.477382393                    |                                            |
| CS_13698                              | 1.203629935                    | 1.470235322                    |                                            |
| CS_13826                              | 1.632887725                    | 2.3850588                      |                                            |
| CS_14180                              | 1.776664748                    | 1.805394421                    | PF01975.15;PF08194.10                      |
| CS_1450                               | 2.639810041                    | 3.0850408                      |                                            |
| CS_2192                               | 1.598962605                    | 1.537557821                    | PF05572.11                                 |
| CS_2462                               | 1.357751802                    | 2.01494863                     |                                            |
| CS_2849                               | 3.765488288                    | 3.030392536                    | PF01083.20                                 |
| CS_3627                               | 4.32425922                     | 4.693243029                    | PF01299.15                                 |
| CS_4305                               | 1.650706185                    | 2.189434012                    |                                            |
| CS_5126                               | 1.597164044                    | 1.329395773                    |                                            |
| CS_5549                               | 2.64639633                     | 1.522746502                    | PF04616.12                                 |
| CS_5993                               | 1.645775359                    | 2.095618051                    | PF02102.13                                 |
| CS_6375                               | 2.443678064                    | 3.808943577                    |                                            |
| CS_6507                               | 1.186628649                    | 1.771001614                    |                                            |
| CS_6519                               | 1.522234394                    | 1.13988111                     |                                            |
| CS_7013                               | 1.347134813                    | 2.689969162                    | PF01464.18                                 |
| CS_7825                               | 1.399848688                    | 2.128585474                    | PF06766.9                                  |
| CS_8980                               | 1.14890451                     | 2.128585474                    | PF13855.4                                  |
| <b>24 hpt specific response</b>       |                                |                                |                                            |
| CS_5950                               | 1.143471121                    | 0                              |                                            |
| CS_14378                              | 1.123675009                    | 0                              |                                            |
| CS_6648                               | 1.630961042                    | 0                              | PF16541.3                                  |
| CS_6343                               | 1.105598855                    | 0                              | PF14295.4                                  |
| CS_7181                               | 1.074128655                    | 0                              | PF01764.23;PF12146.6;PF11187.6;PF12695.5   |
| CS_3041                               | 1.605806429                    | 0                              | PF10428.7                                  |
| CS_5895                               | 1.619667526                    | 0                              | PF00722.19                                 |
| CS_4322                               | 1.089572782                    | 0                              |                                            |
| CS_10049                              | 1.481232563                    | 0                              |                                            |
| <b>48 hpt specific response</b>       |                                |                                |                                            |
| CS_6351                               | 0                              | 1.073464646                    |                                            |
| CS_6880                               | 0                              | 1.067245421                    |                                            |
| CS_7842                               | 0                              | 1.942956812                    |                                            |
| CS_10678                              | 0                              | 1.104120746                    | PF06362.9                                  |
| CS_10793                              | 0                              | 1.154404406                    | PF08277.10;PF08088.10                      |
| CS_5724                               | 0                              | 2.313772305                    |                                            |
| CS_4711                               | 0                              | 1.726524857                    | PF00188.24                                 |
| CS_2102                               | 0                              | 1.35045466                     |                                            |
| CS_13996                              | 0                              | 2.447081338                    | PF06101.9                                  |
| CS_14211                              | 0                              | 1.425949938                    | PF09543.8                                  |
| CS_10092                              | 0                              | 1.19315987                     |                                            |
| CS_5669                               | 0                              | 2.344956818                    | PF08278.9;PF02601.13                       |
| CS_13308                              | 0                              | 1.446219519                    | PF06766.9;PF04107.11                       |
| CS_7636                               | 0                              | 1.514760614                    | PF11937.6                                  |
| CS_1033                               | 0                              | 1.440295757                    | PF07510.9;PF13395.4                        |
| CS_9858                               | 0                              | 1.112990029                    | PF06766.9;PF07172.9;PF03153.11             |
| CS_10515                              | 0                              | 1.284793937                    | PF14787.4;PF09055.9;PF11371.6;PF00322.15   |

**Table S6. Fold changes of the back bone genes involved in secondary metabolisms after starvation treatment**

| <b>ID</b> | <b>Fold change (24 h.p.t.)</b> | <b>Fold change (48 h.p.t.)</b> |           |
|-----------|--------------------------------|--------------------------------|-----------|
| CS_7943   | -2.53959                       | -4.245443                      | NRPS      |
| CS_10271  | -2.11139                       | -3.158072                      | NRPS      |
| CS_8069   | 0                              | -2.003614                      | NRPS      |
| CS_7792   | 0                              | -1.880083                      | NRPS-Like |
| CS_13554  | -1.67396                       | -1.701354                      | NRPS-Like |
| CS_12309  | 1.857102                       | 0                              | NRPS      |
| CS_1378   | 1.509871                       | 0                              | NRPS      |
| CS_3644   | 1.468157                       | 0                              | NRPS      |
| CS_4803   | 1.875562                       | 0                              | PKS       |
| CS_4808   | 1.223659                       | 0                              | NRPS      |
| CS_4966   | 1.12403                        | 0                              | NRPS      |
| CS_6274   | 1.258769                       | 0                              | NRPS-Like |
| CS_8012   | 1.002131                       | 0                              | NRPS-Like |
| CS_9051   | 1.486261                       | 0                              | NRPS      |
| CS_9632   | 1.335495                       | 0                              | NRPS      |
| CS_9769   | 4.260817                       | 0                              | NRPS-Like |
| CS_1751   | 1.735149                       | 1.0550677                      | NRPS      |
| CS_8530   | 2.051354                       | 1.2652224                      | PKS       |
| CS_3310   | 1.729707                       | 1.503723                       | PKS       |
| CS_3706   | 1.810788                       | 1.5680306                      | PKS       |
| CS_4538   | 1.097265                       | 1.6445481                      | NRPS-Like |
| CS_8162   | 1.783491                       | 1.7085898                      | NRPS-Like |
| CS_3555   | 2.03392                        | 1.8009415                      | NRPS-Like |
| CS_8963   | 1.516497                       | 2.3610022                      | PKS       |
| CS_14194  | 3.095503                       | 2.7913783                      | NRPS      |
| CS_8968   | 3.697095                       | 3.1196359                      | NRPS-Like |

**Table S7. Annotation of putative back-bone genes of secondary metabolisms.**

| Gene ID  | UniProt entry          | Protein name                                                                                                                                                                                                                                                                                                                                                                                                                               | Organism                                                                                                                               | E value   |
|----------|------------------------|--------------------------------------------------------------------------------------------------------------------------------------------------------------------------------------------------------------------------------------------------------------------------------------------------------------------------------------------------------------------------------------------------------------------------------------------|----------------------------------------------------------------------------------------------------------------------------------------|-----------|
| CS_10271 | <a href="#">Q31826</a> | Putative acyl-CoA synthetase YngI (EC 6.2.1.-)                                                                                                                                                                                                                                                                                                                                                                                             | Bacillus subtilis                                                                                                                      | 7.00E-50  |
| CS_10382 | <a href="#">Q4WLW5</a> | Nonribosomal peptide synthetase 12 (EC 6.3.2.-)                                                                                                                                                                                                                                                                                                                                                                                            | Neosartorya fumigata (strain ATCC MYA-4609 / Af293 / CBS 101355 / FGSC A1100) (Aspergillus fumigatus)                                  | 4.00E-97  |
| CS_10530 | <a href="#">Q12397</a> | Putative sterigmatocystin biosynthesis polyketide synthase                                                                                                                                                                                                                                                                                                                                                                                 | Emericella nidulans(Aspergillus nidulans)                                                                                              | 0         |
| CS_12309 | <a href="#">Q4WVN4</a> | Nonribosomal peptide synthetase 8 (EC 6.3.2.-)                                                                                                                                                                                                                                                                                                                                                                                             | Neosartorya fumigata (strain ATCC MYA-4609 / Af293 / CBS 101355 / FGSC A1100) (Aspergillus fumigatus)                                  | 0         |
| CS_12869 | <a href="#">Q9Y7D5</a> | Lovastatin diketide synthase LovF (LDKS) (EC 2.3.1.244)                                                                                                                                                                                                                                                                                                                                                                                    | Aspergillus terreus                                                                                                                    | 0         |
| CS_13554 | <a href="#">Q70LM4</a> | Linear gramicidin synthase subunit D [Includes: ATP-dependent D-leucine adenylase (D-LeuA) (D-leucine activase); Leucine racemase [ATP-hydrolyzing] (EC 5.1.1.-); ATP-dependent tryptophan adenylase (TrpA) (Tryptophan activase); ATP-dependent glycine adenylase (GlyA) (Glycine activase); Linear gramicidin--PCP reductase (EC 1.-.-.-)]                                                                                               | Brevibacillus parabrevis                                                                                                               | 4.00E-119 |
| CS_1378  | <a href="#">Q00869</a> | Enniatin synthase [Includes: N-methylcyclopeptide synthetase (EC 6.3.2.-); S-adenosyl-L-methionine-dependent N-methyltransferase (EC 2.1.1.-)]                                                                                                                                                                                                                                                                                             | Fusarium equiseti (Fusarium scirpi)                                                                                                    | 0         |
| CS_1392  | <a href="#">Q00869</a> | Enniatin synthase [Includes: N-methylcyclopeptide synthetase (EC 6.3.2.-); S-adenosyl-L-methionine-dependent N-methyltransferase (EC 2.1.1.-)]                                                                                                                                                                                                                                                                                             | Fusarium equiseti (Fusarium scirpi)                                                                                                    | 0         |
| CS_14194 | <a href="#">Q30409</a> | Tyrocidine synthase 3 (Tyrocidine synthase III) [Includes: ATP-dependent asparagine adenylase (AsnA) (Asparagine activase); ATP-dependent glutamine adenylase (GlnA) (Glutamine activase); ATP-dependent tyrosine adenylase (TyrA) (Tyrosine activase); ATP-dependent valine adenylase (ValA) (Valine activase); ATP-dependent ornithine adenylase (OrnA) (Ornithine activase); ATP-dependent leucine adenylase (LeuA) (Leucine activase)] | Brevibacillus parabrevis                                                                                                               | 0         |
| CS_14650 | <a href="#">Q9Y7D5</a> | Lovastatin diketide synthase LovF (LDKS) (EC 2.3.1.244)                                                                                                                                                                                                                                                                                                                                                                                    | Aspergillus terreus                                                                                                                    | 0         |
| CS_14653 | <a href="#">Q12053</a> | Noranthrone synthase (EC 2.3.1.221) (Aflatoxin biosynthesis polyketide synthase) (PKS) (Aflatoxin biosynthesis protein C) (Polyketide synthase A)                                                                                                                                                                                                                                                                                          | Aspergillus parasiticus                                                                                                                | 0         |
| CS_1751  | <a href="#">Q4WZ44</a> | Nonribosomal peptide synthetase 7 (EC 6.3.2.-)                                                                                                                                                                                                                                                                                                                                                                                             | Neosartorya fumigata (strain ATCC MYA-4609 / Af293 / CBS 101355 / FGSC A1100) (Aspergillus fumigatus)                                  | 0         |
| CS_2372  | <a href="#">Q9Y7D5</a> | Lovastatin diketide synthase LovF (LDKS) (EC 2.3.1.244)                                                                                                                                                                                                                                                                                                                                                                                    | Aspergillus terreus                                                                                                                    | 0         |
| CS_2572  | <a href="#">Q03149</a> | Conidial yellow pigment biosynthesis polyketide synthase(PKS) (EC 2.3.1.-)                                                                                                                                                                                                                                                                                                                                                                 | Emericella nidulans (Aspergillus nidulans)                                                                                             | 0         |
| CS_3028  | <a href="#">Q12397</a> | Putative sterigmatocystin biosynthesis polyketide synthase                                                                                                                                                                                                                                                                                                                                                                                 | Emericella nidulans(Aspergillus nidulans)                                                                                              | 0         |
| CS_3310  | <a href="#">A1CLY8</a> | Polyketide synthase-nonribosomal peptide synthetase (PKS-NRPS) (EC 2.3.1.-) (EC 6.3.2.-) (Cytochalasin biosynthesis protein A)                                                                                                                                                                                                                                                                                                             | Aspergillus clavatus                                                                                                                   | 0         |
| CS_3555  | <a href="#">P0C064</a> | Gramicidin S synthase 2                                                                                                                                                                                                                                                                                                                                                                                                                    | Brevibacillus brevis (Bacillus brevis)                                                                                                 | 6.00E-65  |
| CS_3644  | <a href="#">Q4WLW5</a> | Nonribosomal peptide synthetase 12 (EC 6.3.2.-)                                                                                                                                                                                                                                                                                                                                                                                            | Neosartorya fumigata (Aspergillus fumigatus)                                                                                           | 0         |
| CS_3702  | <a href="#">Q9Y7D5</a> | Lovastatin diketide synthase LovF (LDKS) (EC 2.3.1.244)                                                                                                                                                                                                                                                                                                                                                                                    | Aspergillus terreus                                                                                                                    | 4.00E-147 |
| CS_3706  | <a href="#">Q03149</a> | Conidial yellow pigment biosynthesis polyketide synthase(PKS) (EC 2.3.1.-)                                                                                                                                                                                                                                                                                                                                                                 | Emericella nidulans (Aspergillus nidulans)                                                                                             | 2.00E-166 |
| CS_4538  | <a href="#">Q31826</a> | Putative acyl-CoA synthetase YngI (EC 6.2.1.-)                                                                                                                                                                                                                                                                                                                                                                                             | Bacillus subtilis                                                                                                                      | 7.00E-38  |
| CS_4551  | <a href="#">Q12397</a> | Putative sterigmatocystin biosynthesis polyketide synthase                                                                                                                                                                                                                                                                                                                                                                                 | Emericella nidulans(Aspergillus nidulans)                                                                                              | 0         |
| CS_4672  | <a href="#">A1DA59</a> | Nonribosomal peptide synthetase 13 (EC 6.3.3.-) (Brevianamide F synthase) (Fumitremorgin biosynthesis protein A)                                                                                                                                                                                                                                                                                                                           | Neosartorya fischeri (strain ATCC 1020 / DSM 3700 / CBS 544.65 / FGSC A1164 / JCM 1740 / NRRL 181 / WB 181) (Aspergillus fischerianus) | 0         |
| CS_4803  | <a href="#">Q9Y7D5</a> | Lovastatin diketide synthase LovF (LDKS) (EC 2.3.1.244)                                                                                                                                                                                                                                                                                                                                                                                    | Aspergillus terreus                                                                                                                    | 3.00E-172 |
| CS_4808  | <a href="#">Q4WLW5</a> | Nonribosomal peptide synthetase 12 (EC 6.3.2.-)                                                                                                                                                                                                                                                                                                                                                                                            | Neosartorya fumigata (strain ATCC MYA-4609 / Af293 / CBS 101355 / FGSC A1100) (Aspergillus fumigatus)                                  | 0         |
| CS_4966  | <a href="#">Q01886</a> | HC-toxin synthetase (HTS) (EC 6.3.2.-)                                                                                                                                                                                                                                                                                                                                                                                                     | Cochliobolus carbonum (Maize leaf spot fungus) (Bipolaris zeicola)                                                                     | 0         |
| CS_5102  | <a href="#">Q03149</a> | Conidial yellow pigment biosynthesis polyketide synthase(PKS) (EC 2.3.1.-)                                                                                                                                                                                                                                                                                                                                                                 | Emericella nidulans (Aspergillus nidulans)                                                                                             | 6.00E-130 |

|         |                          |                                                                                                                                                                                                                                                                                                                                                 |                                                                                                                               |           |
|---------|--------------------------|-------------------------------------------------------------------------------------------------------------------------------------------------------------------------------------------------------------------------------------------------------------------------------------------------------------------------------------------------|-------------------------------------------------------------------------------------------------------------------------------|-----------|
| CS_5256 | <a href="#">Q4WLW5</a>   | Nonribosomal peptide synthetase 12 (EC 6.3.2.-)                                                                                                                                                                                                                                                                                                 | Neosartorya fumigata (strain ATCC MYA-4609 / Af293 / CBS 101355 / FGSC A1100) (Aspergillus fumigatus)                         | 0         |
| CS_5769 | <a href="#">Q03149</a>   | Conidial yellow pigment biosynthesis polyketide synthase(PKS) (EC 2.3.1.-)                                                                                                                                                                                                                                                                      | Emericella nidulans (strain FGSC A4 / ATCC 38163 / CBS 112.46 / NRRL 194 / M139) (Aspergillus nidulans)                       | 0         |
| CS_6205 | <a href="#">Q4WVN4</a>   | Nonribosomal peptide synthetase 8 (EC 6.3.2.-)                                                                                                                                                                                                                                                                                                  | Neosartorya fumigata (strain ATCC MYA-4609 / Af293 / CBS 101355 / FGSC A1100) (Aspergillus fumigatus)                         | 2.00E-94  |
| CS_6274 | <a href="#">Q4WAW3</a>   | Nonribosomal peptide synthetase 13 (EC 6.3.3.-) (Brevianamide F synthase) (Fumitremogin biosynthesis protein A)                                                                                                                                                                                                                                 | Neosartorya fumigata (strain ATCC MYA-4609 / Af293 / CBS 101355 / FGSC A1100) (Aspergillus fumigatus)                         | 1.00E-145 |
| CS_6745 | <a href="#">O94297</a>   | Putative 3-oxoacyl-[acyl-carrier-protein] synthase, mitochondrial (EC 2.3.1.41) (Beta-ketoacyl-ACP synthase) (mtKAS)                                                                                                                                                                                                                            | Schizosaccharomyces pombe (strain 972 / ATCC 24843) (Fission yeast)                                                           | 5.00E-159 |
| CS_7145 | <a href="#">Q4WF61</a>   | Nonribosomal peptide synthetase 3 (EC 6.3.2.-) (Siderophore peptide synthase E)                                                                                                                                                                                                                                                                 | Neosartorya fumigata (strain ATCC MYA-4609 / Af293 / CBS 101355 / FGSC A1100) (Aspergillus fumigatus)                         | 0         |
| CS_7580 | <a href="#">Q4WAZ9</a>   | PKS-NRPS hybrid synthetase <i>psaA</i> (EC 2.3.1.-) (EC 6.3.2.-) (Nonribosomal peptide synthetase 14) (NRPS14) (Pseurotin biosynthesis protein A)                                                                                                                                                                                               | Neosartorya fumigata (strain ATCC MYA-4609 / Af293 / CBS 101355 / FGSC A1100) (Aspergillus fumigatus)                         | 0         |
| CS_7792 | <a href="#">P37693</a>   | Polyketide synthase HetM                                                                                                                                                                                                                                                                                                                        | Nostoc sp. (strain PCC 7120 / SAG 25.82 / UTEX 2576)                                                                          | 4.00E-21  |
| CS_7943 | <a href="#">Q4WVN4</a>   | Nonribosomal peptide synthetase 8 (EC 6.3.2.-)                                                                                                                                                                                                                                                                                                  | Neosartorya fumigata (strain ATCC MYA-4609 / Af293 / CBS 101355 / FGSC A1100) (Aspergillus fumigatus)                         | 0         |
| CS_8012 | <a href="#">Q70LM4</a>   | Linear gramicidin synthase subunit D [Includes: ATP-dependent D-leucine adenylyase (D-LeuA) (D-leucine activase); Leucine racemase [ATP-hydrolyzing] (EC 5.1.1.-); ATP-dependent tryptophan adenylyase (TrpA) (Tryptophan activase); ATP-dependent glycine adenylyase (GlyA) (Glycine activase); Linear gramicidin--PCP reductase (EC 1.-.-.-)] | Brevibacillus parabrevis                                                                                                      | 3.00E-21  |
| CS_8069 | <a href="#">Q4WF53</a>   | Nonribosomal peptide synthetase 4 (EC 6.3.2.-) (Siderophore peptide synthase D)                                                                                                                                                                                                                                                                 | Neosartorya fumigata (strain ATCC MYA-4609 / Af293 / CBS 101355 / FGSC A1100) (Aspergillus fumigatus)                         | 0         |
| CS_8162 | <a href="#">Q4WLW5</a>   | Nonribosomal peptide synthetase 12 (EC 6.3.2.-)                                                                                                                                                                                                                                                                                                 | Neosartorya fumigata (strain ATCC MYA-4609 / Af293 / CBS 101355 / FGSC A1100) (Aspergillus fumigatus)                         | 9.00E-104 |
| CS_8530 | <a href="#">Q9Y7D5</a>   | Lovastatin diketide synthase LovF (LDKS) (EC 2.3.1.244)                                                                                                                                                                                                                                                                                         | Aspergillus terreus                                                                                                           | 0         |
| CS_8963 | <a href="#">Q03149</a>   | Conidial yellow pigment biosynthesis polyketide synthase(PKS) (EC 2.3.1.-)                                                                                                                                                                                                                                                                      | Emericella nidulans (Aspergillus nidulans)                                                                                    | 0         |
| CS_9051 | <a href="#">Q4WR82</a>   | Nonribosomal peptide synthetase 2 (EC 6.3.2.-) (Siderophore peptide synthase C)                                                                                                                                                                                                                                                                 | Neosartorya fumigata (strain ATCC MYA-4609 / Af293 / CBS 101355 / FGSC A1100) (Aspergillus fumigatus)                         | 0         |
| CS_9052 | <a href="#">Q4WR82</a>   | Nonribosomal peptide synthetase 2 (EC 6.3.2.-) (Siderophore peptide synthase C)                                                                                                                                                                                                                                                                 | Neosartorya fumigata (strain ATCC MYA-4609 / Af293 / CBS 101355 / FGSC A1100) (Aspergillus fumigatus)                         | 0         |
| CS_9162 | <a href="#">Q4WLW5</a>   | Nonribosomal peptide synthetase 12 (EC 6.3.2.-)                                                                                                                                                                                                                                                                                                 | Neosartorya fumigata (strain ATCC MYA-4609 / Af293 / CBS 101355 / FGSC A1100) (Aspergillus fumigatus)                         | 8.00E-92  |
| CS_9448 | <a href="#">Q4WLW5</a>   | Nonribosomal peptide synthetase 12 (EC 6.3.2.-)                                                                                                                                                                                                                                                                                                 | Neosartorya fumigata (strain ATCC MYA-4609 / Af293 / CBS 101355 / FGSC A1100) (Aspergillus fumigatus)                         | 4.00E-110 |
| CS_949  | <a href="#">A1CLY8</a>   | Polyketide synthase-nonribosomal peptide synthetase (PKS-NRPS) (EC 2.3.1.-) (EC 6.3.2.-) (Cytochalasin biosynthesis protein A)                                                                                                                                                                                                                  | Aspergillus clavatus                                                                                                          | 0         |
| CS_9632 | <a href="#">Q9P7T1</a>   | Hydroxamate-type ferrichrome siderophore peptide synthetase (EC 6.-.-.-)                                                                                                                                                                                                                                                                        | Schizosaccharomyces pombe (strain 972 / ATCC 24843) (Fission yeast)                                                           | 0         |
| CS_9769 | <a href="#">Q4WT66</a>   | Nonribosomal peptide synthetase 1 (EC 6.3.2.-)                                                                                                                                                                                                                                                                                                  | Neosartorya fumigata (strain ATCC MYA-4609 / Af293 / CBS 101355 / FGSC A1100) (Aspergillus fumigatus)                         | 6.00E-110 |
| CS_9876 | <a href="#">Q4WVN4</a>   | Nonribosomal peptide synthetase 8 (EC 6.3.2.-)                                                                                                                                                                                                                                                                                                  | Neosartorya fumigata (strain ATCC MYA-4609 / Af293 / CBS 101355 / FGSC A1100) (Aspergillus fumigatus)                         | 1.00E-94  |
| CS_9957 | <a href="#">Q12397</a>   | Putative sterigmatocystin biosynthesis polyketide synthase (PKS)                                                                                                                                                                                                                                                                                | Emericella nidulans (strain FGSC A4 / ATCC 38163 / CBS 112.46 / NRRL 194 / M139) (Aspergillus nidulans)                       | 0         |
| CS_7958 | <a href="#">W7N2C1.1</a> | Non-canonical non-ribosomal peptide synthetase FUB8 (EC 2.3.1.-) (Fusaric acid biosynthesis protein 8)                                                                                                                                                                                                                                          | Gibberella moniliformis (strain M3125 / FGSC 7600) (Maize ear and stalk rot fungus) (Fusarium verticillioides)                | 1.00E-122 |
| CS_8968 | <a href="#">S0DXJ2</a>   | Non-canonical non-ribosomal peptide synthetase FUB8 (EC 2.3.1.-) (Fusaric acid biosynthesis protein 8)                                                                                                                                                                                                                                          | Gibberella fujikuroi (strain CBS 195.34 / IMI 58289 / NRRL A-6831) (Bakanae and foot rot disease fungus) (Fusarium fujikuroi) | 3.00E-88  |

**Table S8. Annotation of putative NRPS and PKS by functional domains**

| Gene type | Gene ID  | Domain SBSPKS          | Domain antiSMASH            |
|-----------|----------|------------------------|-----------------------------|
| NRPS      | CS_3555  | AT                     | AP                          |
|           | CS_3644  | CATCCATC               | CAPECAPC                    |
|           | CS_1378  | ATC                    | APCA                        |
|           | CS_1392  | ATC                    | APCAPCAPCAPCAPCAPCAPCAPCA   |
|           | CS_10271 | A                      | AC                          |
|           | CS_10382 | TC                     | PC                          |
|           | CS_9769  | A                      | A                           |
|           | CS_9876  | A                      | A-NAD                       |
|           | CS_5256  | CATCAT                 | CAPCAP                      |
|           | CS_8968  | A                      | AP-NAD                      |
|           | CS_9051  | ATCCTC                 | APCCC                       |
|           | CS_9052  | A                      | AC                          |
|           | CS_9162  | ATC                    | APC                         |
|           | CS_4538  | A                      | AC                          |
|           | CS_4672  | ATATC                  | APCAPC                      |
|           | CS_4808  | CATCCATCATC            | CAPCCAPCAPE                 |
|           | CS_12309 | ATC                    | CAPCAPCPECAPECAPECPECAPCAPC |
|           | CS_4966  | CATECATCAT             | CAPECAPCAP                  |
|           | CS_13554 | AT                     | AP-KR                       |
|           | CS_14194 | CATCATCATCATCATCATCATC | CAPCAPCAPCAPCAPCAPCAPC      |
|           | CS_8069  | ATCT                   | APCPC                       |
|           | CS_8162  | AT                     | APC                         |
|           | CS_9448  | A                      | APC                         |
|           | CS_9632  | ACATCTCACTC            | ACAPCPCACPCC                |
|           | CS_6205  | CA                     | CA                          |
|           | CS_6274  | AT                     | AP                          |
|           | CS_7145  | ATCATC                 | APCAPC                      |
|           | CS_7792  | ATC                    | A                           |
|           | CS_7943  | ATCATCATCATCATC        | APCAPCAPCAPCAPC             |
|           | CS_7958  | ATC                    | A-NAD                       |
|           | CS_8012  | ATC                    | A                           |
|           | CS_1751  | ATCAT                  | APCAPC                      |
|           | PKS      | CS_949                 | KS                          |
| CS_2572   |          | -                      | KS-AT                       |
| CS_3028   |          | -                      | KS-AT-TE                    |
| CS_3310   |          | KS                     | KS-AT-DH-ER-KR              |
| CS_3702   |          | KS                     | KS-AT-DH-ER-KR              |
| CS_3706   |          | -                      | KS-AT-TE                    |
| CS_5102   |          | -                      | KS-AT                       |
| CS_9957   |          | ACP                    | KS-AT-TE                    |
| CS_5769   |          | -                      | KS-AT-TE                    |
| CS_8963   |          | -                      | KS-AT-DH-TE                 |
| CS_4551   |          | -                      | KS-AT                       |
| CS_14650  |          | KS                     | KS-AD-DH-KR                 |
| CS_14653  |          | -                      | KS-AT-DH-TE                 |
| CS_4803   |          | KS                     | KS-AT-DH-ER-KR              |
| CS_12869  |          | -                      | KS-AT-DH-ER-KR              |
| CS_6745   |          | KS                     | KS                          |
| CS_7580   |          | KS                     | KS-AT-DH-KR-C-A             |
| CS_2372   |          | KS                     | KS-AT-DH-ER-KR              |
| CS_10530  |          | -                      | KS-AT-DH-TE                 |
| CS_8530   |          | KS                     | KS-AT-DH-ER-KR              |

**Table S9. Comparison of Carbohydrate-active enzymes (CAZymes) between *C. soja* and several other ascomycetes**

| Protein family                     | Cs  | Mo  | Nc  | An  | Fg  | Bc  | Ss  |
|------------------------------------|-----|-----|-----|-----|-----|-----|-----|
| cutinase                           | 3   | 18  | 3   | 4   | 12  | 11  | 8   |
| Auxiliary activity family          | 73  | 104 | 64  | 85  | 104 | 83  | 72  |
| Carbohydrate-binding module family | 34  | 55  | 40  | 86  | 51  | 40  | 41  |
| CBM1 family                        | 1   | 9   | 14  | 7   | 7   | 8   | 6   |
| Carbohydrate esterase              | 108 | 122 | 68  | 103 | 122 | 100 | 90  |
| Glycoside hydrolase                | 252 | 244 | 176 | 277 | 243 | 226 | 210 |
| Glycosyltransferase                | 122 | 100 | 90  | 89  | 101 | 100 | 88  |
| Polysaccharide lyase               | 7   | 5   | 4   | 21  | 20  | 12  | 5   |
| CAZymes                            | 596 | 630 | 442 | 661 | 641 | 561 | 506 |

Note: Cs, *Cercospora soja*; Mo, *Magnaporthe oryzae*; Nc, *Neurospora crassa*; An, *Aspergillus nidulans*; Fg, *Fusarium graminearum*; Bc, *Botrytis cinerea*; Ss, *Sclerotinia sclerotiorum*.

**Table S10. Annotated GH109 family members in *C. soja*, *M. oryzae*, *B. cinerea*, and *N. crassa***

| Species           | Predicted GH109 family members                                                                                                        |
|-------------------|---------------------------------------------------------------------------------------------------------------------------------------|
| <i>C. soja</i>    | CS_10112, CS_11283, CS_12100, CS_12444, CS_12722, CS_13299, CS_13397, CS_13604, CS_14356, CS_2770, CS_2984, CS_3368, CS_7753, CS_8689 |
| <i>M. oryzae</i>  | MGG_02902T0, MGG_05346T0, MGG_07463T0, MGG_08115T0, MGG_08569T0, MGG_08695T0, MGG_10499T0, MGG_11542T0                                |
| <i>B. cinerea</i> | BC1T_01052, BC1T_02503, BC1T_04110, BC1T_07162, BC1T_14802                                                                            |
| <i>N. crassa</i>  | NCU01704T0, NCU08882T0, NCU09533T0, NCU09794T0                                                                                        |

**Table S11 Putative effectors can be annotated by PHI database**

| Gene     | E value   | Annotation                                                                                                                        |
|----------|-----------|-----------------------------------------------------------------------------------------------------------------------------------|
| CS_5557  | 0         | Ktr4 PHI:3096 J5K093 176275 Beauveria_bassiana reduced_virulence_                                                                 |
| CS_11276 | 2.00E-108 | pnl1 PHI:3226 T2C7K6 36651 Penicillium_digitatum reduced_virulence_                                                               |
| CS_5966  | 1.00E-101 | PHI:811 MGG_10510 EDK06580 318829 Magnaporthe_oryzae Reduced_virulence                                                            |
| CS_9887  | 3.00E-93  | PHI:2209 endo-1,4-beta-xylanase_[GH10_family] MGG_07868 148305 Magnaporthe_oryzae_(related:_Magnaporthe_grisea) Reduced_virulence |
| CS_12662 | 3.00E-78  | PHI:2897 BEC1019 KJ571201.1 62688 Blumeria_graminis_f._sp._hordei Effector_(plant_avirulence_determinant)                         |
| CS_3288  | 7.00E-76  | PHI:479 MEP1 AAQ07436 199306 Coccidioides_posadasii Reduced_virulence                                                             |
| CS_5928  | 8.00E-73  | PHI:2208 endo-1,4-beta-xylanase_[GH10_family] MGG_05464 148305 Magnaporthe_oryzae_(related:_Magnaporthe_grisea) Reduced_virulence |
| CS_14682 | 1.00E-64  | PHI:61 BGL2 AAA21151 5476 Candida_albicans Reduced_virulence                                                                      |
| CS_6365  | 1.00E-62  | PHI:2896 BEC1005 CCU82697 62688 Blumeria_graminis_f._sp._hordei Effector_(plant_avirulence_determinant)                           |
| CS_10321 | 8.00E-62  | PHI:479 MEP1 AAQ07436 199306 Coccidioides_posadasii Reduced_virulence                                                             |
| CS_14119 | 3.00E-60  | PHI:179 PELA AAA33338 140110 Nectria_haematococca_(related:_Fusarium_solani) Reduced_virulence                                    |
| CS_2192  | 2.00E-52  | PHI:479 MEP1 AAQ07436 199306 Coccidioides_posadasii Reduced_virulence                                                             |
| CS_4985  | 2.00E-54  | PHI:71 ECP2 CAA78401 5499 Cladosporium_fulvum Effector_(plant_avirulence_determinant)                                             |
| CS_1128  | 1.00E-34  | PHI:816 MGG_04582 EDJ95999 318829 Magnaporthe_oryzae Reduced_virulence                                                            |
| CS_7154  | 4.00E-38  | PHI:2118 MgSM1 MGG_05344 148305 Magnaporthe_oryzae_(related:_Magnaporthe_grisea) Effector_(plant_avirulence_determinant)          |
| CS_4417  | 4.00E-21  | PHI:2404 SLP_1 G4N906 148305 Magnaporthe_oryzae_(related:_Magnaporthe_grisea) Reduced_virulence                                   |
| CS_6397  | 3.00E-20  | PHI:653 GIP2 AAL11721 67593 Phytophthora_sojae Effector_(plant_avirulence_determinant)                                            |
| CS_9858  | 1.00E-18  | PHI:487 MHP1 Q94196 148305 Magnaporthe_grisea Reduced_virulence                                                                   |
| CS_13636 | 9.00E-17  | PHI:652 GIP1 AAL11720 67593 Phytophthora_sojae Effector_(plant_avirulence_determinant)                                            |
| CS_2543  | 3.00E-16  | PHI:2644 thioredoxin_1 P0AA28 90371 Salmonella_enterica_serovar_Typhimurium Reduced_virulence                                     |
| CS_5993  | 1.00E-14  | PHI:201 AVR-Pita_(related:_AVR2-YAMO) AAK00131 318829 Magnaporthe_oryzae Effector_(plant_avirulence_determinant)                  |
| CS_1457  | 3.00E-13  | PHI:184 RBT4 AAG09789 5476 Candida_albicans Reduced_virulence                                                                     |
| CS_10055 | 1.00E-12  | PHI:201 AVR-Pita_(related:_AVR2-YAMO) AAK00131 318829 Magnaporthe_oryzae Effector_(plant_avirulence_determinant)                  |
| CS_2945  | 2.00E-11  | PHI:184 RBT4 AAG09789 5476 Candida_albicans Reduced_virulence                                                                     |
| CS_4711  | 2.00E-10  | PHI:184 RBT4 AAG09789 5476 Candida_albicans Reduced_virulence                                                                     |
| CS_7825  | 2.00E-11  | PHI:487 MHP1 Q94196 148305 Magnaporthe_grisea Reduced_virulence                                                                   |
| CS_1450  | 3.00E-09  | PHI:2901 BEC1040 CCU82707 62688 Blumeria_graminis_f._sp._hordei Effector_(plant_avirulence_determinant)                           |
| CS_4239  | 1.00E-58  | PHI:2925 lip2 J9MBA2 59765 Fusarium_oxysporum_f._sp._Lycopersici Unaffected_pathogenicity                                         |
| CS_6874  | 7.00E-53  | PHI:2849 cutA Q99174 70790 Fusarium_solani_f._sp._cucurbitae Unaffected_pathogenicity                                             |
| CS_14017 | 2.00E-18  | PHI:2978 MoCel12A G4N5V2 148305 Magnaporthe_oryzae Unaffected_pathogenicity                                                       |
| CS_13308 | 1.00E-09  | PHI:291 CPPH1 CAD10781 5111 Claviceps_purpurea Unaffected_pathogenicity                                                           |
| CS_7363  | 6.00E-162 | PHI:3 PGN1 AAA79885 5017 Cochliobolus_carbonum Unaffected_pathogenicity                                                           |
| CS_7914  | 1.00E-152 | PHI:115 PGX1 AAC26146 5017 Cochliobolus_carbonum Unaffected_pathogenicity                                                         |
| CS_4002  | 4.00E-07  | PHI:2807 Ss-Si2 A7EKS0 5180 Sclerotinia_sclerotiorum Unaffected_pathogenicity                                                     |
| CS_13926 | 1.00E-07  | PHI:747 um00445 Not_available 5270 Ustilago_maydis Unaffected_pathogenicity                                                       |
| CS_4096  | 4.00E-07  | PHI:1856 GzZC171 11S377 5518 Gibberella_zeae_(related:_Fusarium_graminearum) Unaffected_pathogenicity                             |
| CS_6725  | 1.00E-33  | PHI:2807 Ss-Si2 A7EKS0 5180 Sclerotinia_sclerotiorum Unaffected_pathogenicity                                                     |
| CS_4686  | 7.00E-32  | PHI:552 BcLCC2 AAK77953 40559 Botrytis_cinerea Unaffected_pathogenicity                                                           |
| CS_7181  | 4.00E-21  | PHI:2924 lip1 J9MXG1 59765 Fusarium_oxysporum_f._sp._Lycopersici Unaffected_pathogenicity                                         |
| CS_1544  | 1.00E-19  | PHI:541 LIP1 AAU87359 332648 Botrytis_cinerea Unaffected_pathogenicity                                                            |

**Table S12. Comparison of *C. sojina* race 1 genome sequence with sequenced *C. sojina* isolate (Genome ID:2506520004)**

| <b>C. sojina isolates</b>                                                           | <b>Mapped(%)</b> | <b>Average depth</b> | <b>Cov_ratio_1X(%)</b> | <b>Cov_ratio_5X(%)</b> | <b>Cov_ratio_10X(%)</b> |
|-------------------------------------------------------------------------------------|------------------|----------------------|------------------------|------------------------|-------------------------|
| <i>C. sojina</i> race 1<br>(Sequencing by SMRT in this study)                       | 98.9             | 127 ×                | 99.36                  | 99.23                  | 99.10                   |
| <i>C. sojina</i> isolate<br>(Download from JGI database, IMG genome id: 2506520004) | 72.88            | 125 ×                | 99.86                  | 99.85                  | 99.94                   |

JGI database, Joint genome institute database (<http://jgi.doe.gov/>); IMG, integrated microbial genomes & microbiome samples. Cov\_ratio, coverage ratio.

The data of *C. sojina* strain FLS21 (SAR number, SRR5152073) were retrieved from National Center for Biotechnology Information Search database (NCBI, <https://www.ncbi.nlm.nih.gov/>) and used for mapping to the genome of *C. sojina* race 1 and sequenced *C. sojina* isolate (Genome ID:2506520004). In total, the data contains 56,140,492 reads.
